# Supplementary material for: Organic–inorganic hybrids formed by polyoxometalate-based surfactants with cationic polyelectrolytes and block copolymers
Source: Royal Society of Chemistry journal article supplement (doi:10.1039/c4tc02971b), 2015-01-01
Supplement: c4tc02971b1.pdf [file c4tc02971b1.pdf]

# Organic/inorganic hybrids formed by polyoxometalate-based surfactants with cationic polyelectrolytes and block copolymers

*Chunxia Tan,<sup>a</sup> Nijuan Liu,<sup>a</sup> Bingran Yu,<sup>a,b</sup> Cheng Zhang,<sup>a</sup> Weifeng Bu,<sup>\*a</sup> Xiuli Liu,<sup>b</sup> and Yufei Song<sup>\*b</sup>*

<sup>a</sup>Key Laboratory of Nonferrous Metal Chemistry and Resources Utilization of Gansu Province, State Key Laboratory of Applied Organic Chemistry, and College of Chemistry and Chemical Engineering, Lanzhou University, Lanzhou City, Gansu Province, China

<sup>b</sup>State Key Laboratory of Chemical Resource Engineering, Beijing University of Chemical Technology, Beijing, China

Email: buwf@lzu.edu.cn; songyf@mail.buct.edu.cn

**Materials and Instruments.** Poly(4-vinylpyridine) (PVP) with a molecular weight of 60,000 was obtained from Aldrich. PMV and POV were synthesized by the quantization of PVP with iodomethane and 1-iodooctadecane as described in previous literatures.<sup>s1</sup> Infrared (IR) showed that the bands at 1597 and 1414 cm<sup>-1</sup> associated with the pyridine rings disappeared completely, while the new bands appeared at 1644 and 1466 cm<sup>-1</sup>, corresponding to the valence oscillations in the quarternized pyridine rings. S<sub>480-b-V57</sub> and poly(ethylene glycol-*b*-4-vinylpyridine) were purchased from Polymer Source Inc. and used without further purification. The numbers in subscript denote the degree of polymerization. EG<sub>193-b-V57</sub> was synthesized by the quantization of poly(ethylene glycol-*b*-4-vinylpyridine) with iodomethane, which was similarly confirmed by the IR spectra. The POM-based surfactant of An-16 was prepared according to the literature's procedures<sup>2</sup> and further confirmed by the <sup>1</sup>H NMR and infrared spectra. IR spectra (KBr) were measured with a Nicolet NEXUS 670 spectrometer. <sup>1</sup>H NMR spectra were measured in dimethyl sulfoxide DMSO-*d*<sub>6</sub> solutions with a Varian 600 NMR spectrometer with tetramethylsilane (TMS) as an internal standard. Dynamic light scattering (DLS) measurements were performed on a Brookhaven BI-200SM spectrometer with a He-Ne laser (532 nm). TEM images were obtained with a JEOL JEM-1230 operating at 120 kV. SEM images were obtained with a Hitachi S-4800. To prevent electric charging, a 4-nm thick gold layer was deposited on the specimen by using a Hitachi E-1045 ion sputter. Powder X-ray diffraction (XRD) measurements were performed with an Bruker D8 ADVANCE X'Pert Pro X-ray diffractometer using Cu-K $\alpha$  radiation ( $\lambda = 1.5418 \text{ \AA}$ ). Elemental analyses were performed with an Elementar VarioELcube. Thermogravimetric analysis

(TGA) was measured on a Perkin-Elmer 7 Series Thermal Analysis System. All spectroscopic measurements were carried out at room temperature.

**Preparation and Characterization of the Hybrids of Polyelectrolytes and An<sub>16</sub>.** PMV-An<sub>16</sub> was prepared as follows: An<sub>16</sub> (0.2 g,  $7.6 \times 10^{-5}$  mol) was dissolved into 20 mL of the mixed solvents of acetonitrile/water containing 50 v% acetonitrile. The dropwise addition of the aqueous solution of PMV (0.0563 g,  $2.3 \times 10^{-4}$  mol) into the solution of An<sub>16</sub> yielded an orange suspension. The resultant suspension was further stirred for three hours to allow complete electrostatic interaction between An<sub>16</sub> and PMV. The orange solid product was collected by filtration, washed with water, and dried in vacuo. IR (KBr): 3461, 3274, 3122, 3054, 2960, 2924, 2854, 1670, 1642, 1568, 1547, 1515, 1467, 1375, 1307, 1228, 1186, 1108, 1028, 942, 921, 850, 666, 562, 463 cm<sup>-1</sup>. Elemental analysis calcd. for (C<sub>8</sub>H<sub>10</sub>N)<sub>3</sub>[MnMo<sub>6</sub>O<sub>18</sub>{(OCH<sub>2</sub>)<sub>3</sub>CNHCO(CH<sub>2</sub>)<sub>14</sub>CH<sub>3</sub>}<sub>2</sub>](H<sub>2</sub>O)<sub>7</sub> (2118.23): C 36.29, H 5.71, N, 3.31. Found: C 36.29, H 5.35, N 3.41. PMV-An<sub>16</sub> was prepared according to the similar procedure except that POV was dissolved into tetrahydrofuran. IR (KBr): 3471, 3279, 3053, 3122, 2961, 2924, 2853, 1670, 1642, 1568, 1547, 1515, 1465, 1375, 1312, 1261, 1225, 1171, 1098, 1027, 942, 921, 850, 805, 667, 562, 463 cm<sup>-1</sup>. Elemental analysis calcd. for (C<sub>25</sub>H<sub>42</sub>N)<sub>3</sub>[MnMo<sub>6</sub>O<sub>18</sub>{(OCH<sub>2</sub>)<sub>3</sub>CNHCO(CH<sub>2</sub>)<sub>14</sub>CH<sub>3</sub>}<sub>2</sub>](H<sub>2</sub>O)<sub>6</sub> (2809.64): C 49.16, H 7.68, N 2.49. Found: C 49.17, H 7.39, N 2.43.

#### References:

- S1.** (a) J. P. Gouin, F. Bosse, D. Nguyen, C. E. Williams and A. Eisenberg, *Macromolecules*, 1993, **26**, 7250; (b) J. P. Gouin, C. E. Williams and A. Eisenberg, *Macromolecules*, 1989, **22**, 4573.
- S2.** Y.-F. Song, N. McMillan, D.-L. Long, J. Thiel, Y. Ding, H. Chen, N. Gadegaard and L. Cronin, *Chem. Eur. J.*, 2008, **14**, 2349.

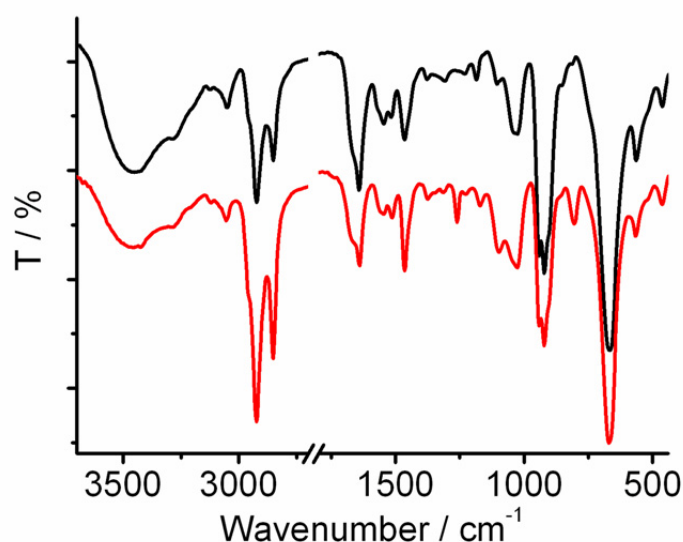

**Fig. S1** IR spectra of the POM-based PSCs, PMV-An<sub>16</sub> (black line) and POV-An<sub>16</sub> (red line).

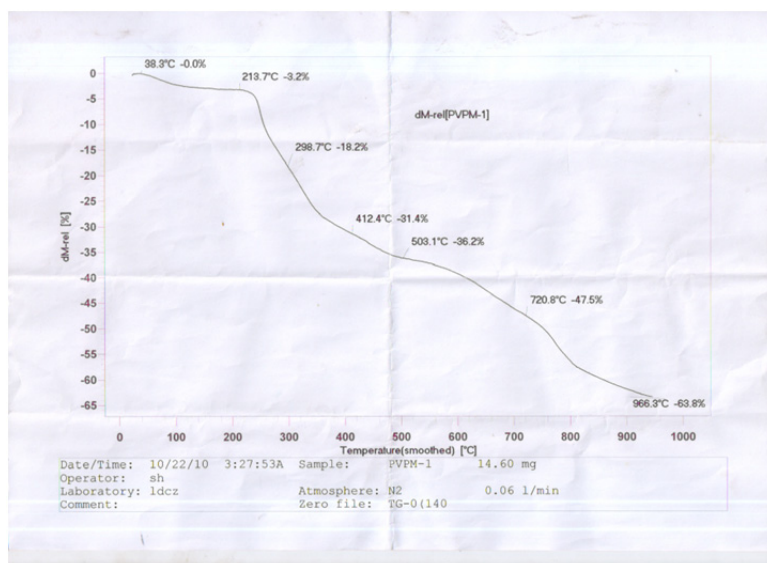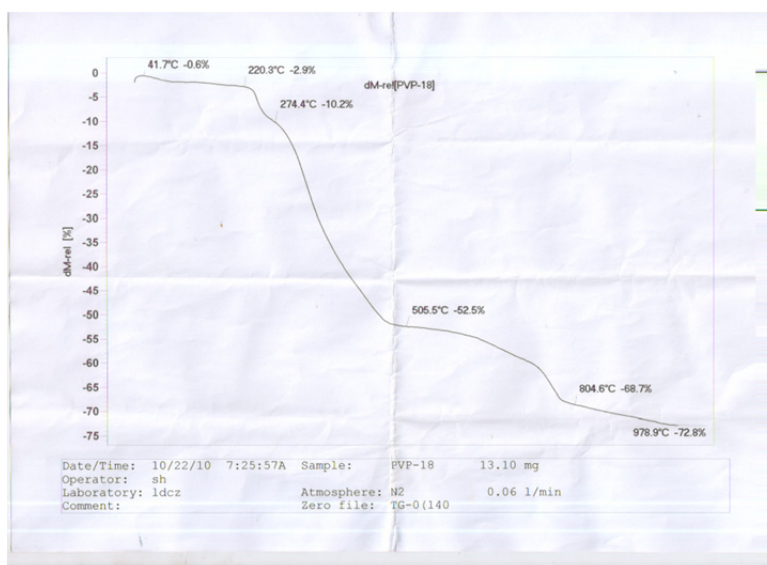

Fig. S2 TGA curves of PMV-An<sub>16</sub> (top) and POV-An<sub>16</sub> (bottom).

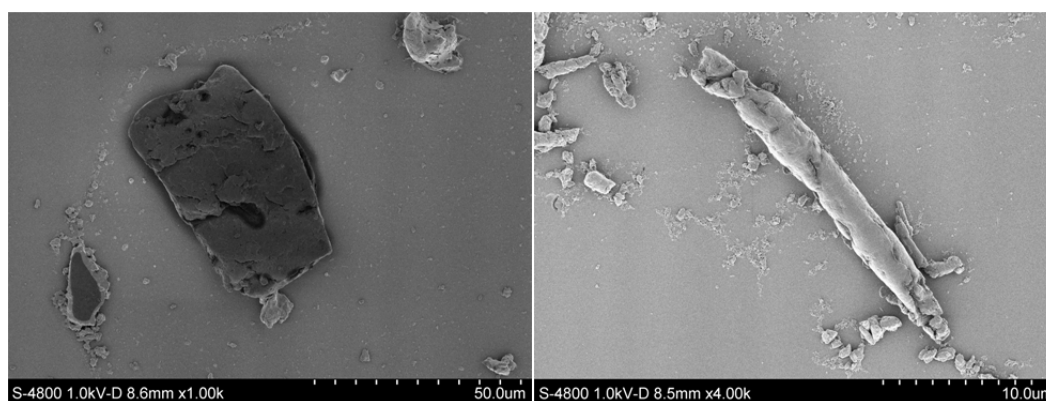

Fig. S3 SEM images of PMV-An<sub>16</sub> (left) and POV-An<sub>16</sub> (right).

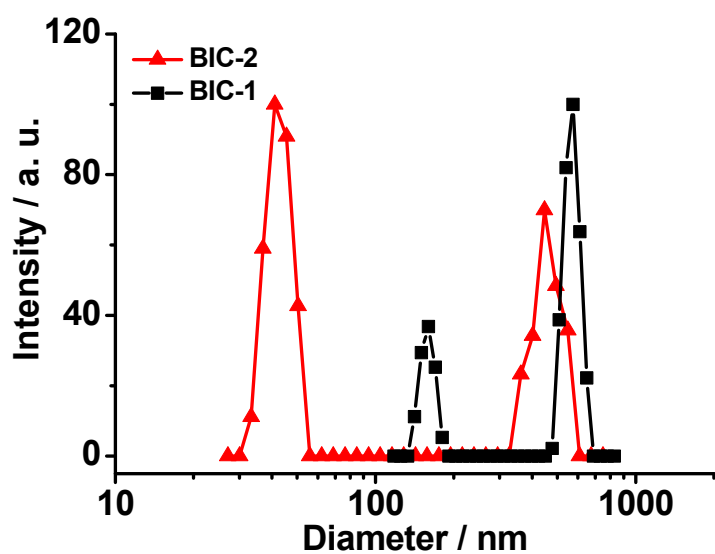

Fig. S4 DLS plots of BIC-1 in water and BIC-2 in toluene.

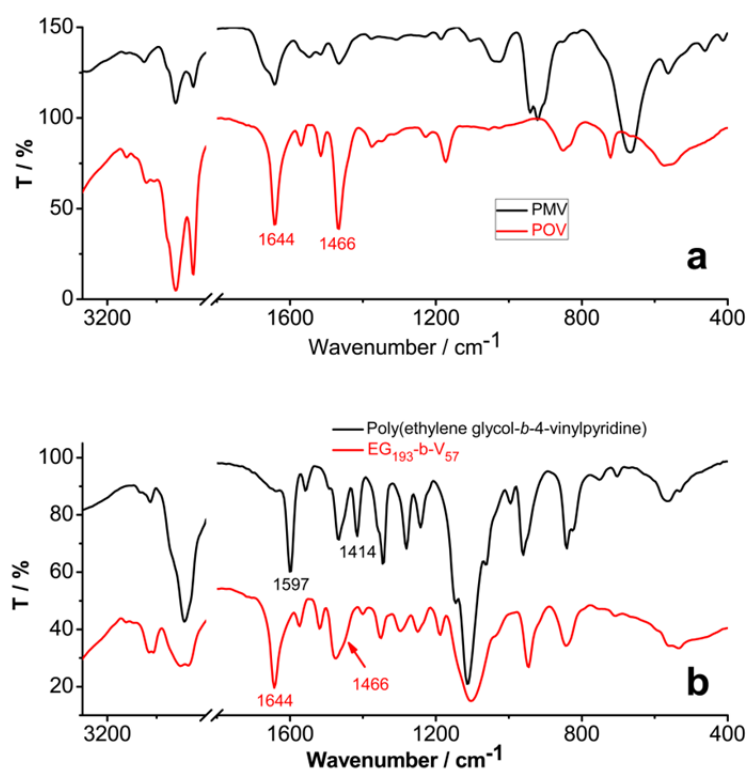

Fig. S5 IR spectra of the PMA, POV, and EG<sub>193</sub>-*b*-V<sub>57</sub>.
